# Supplementary material
Source: Springer Nature journal article supplement (https://www.springermedizin.de/resource/supplementary/12889_2013_6148_MOESM3_ESM.pdf/9494318)
Supplement: MOESM3 [file 9494318]

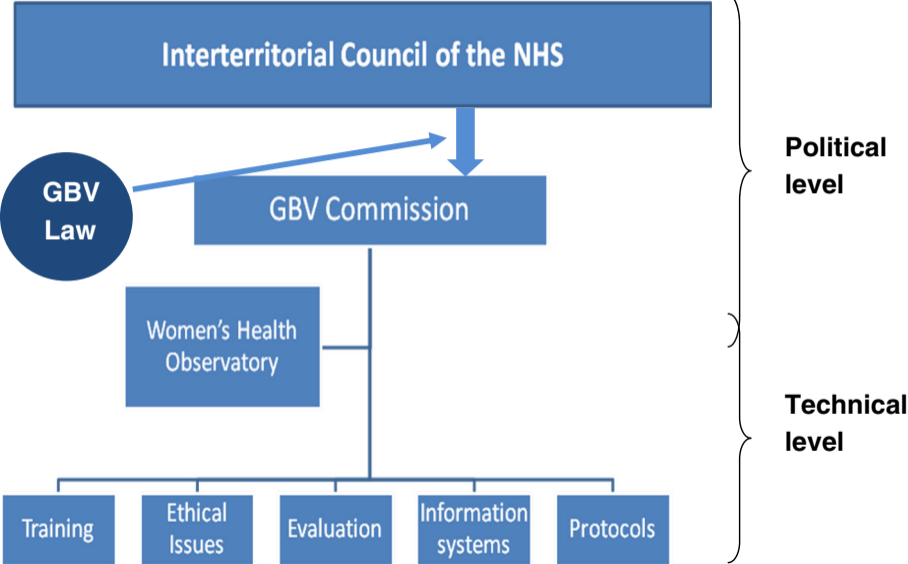

Interterritorial Council of the NHS

GBV  
Law

GBV Commission

Women's Health  
Observatory

Training

Ethical  
Issues

Evaluation

Information  
systems

Protocols

Political  
level

Technical  
level
